# Supplementary material
Source: PubMed Central journal article supplement (PMC2763156)
Supplement: 11606_2009_1027_MOESM1_ESM.pdf [file 11606_2009_1027_MOESM1_ESM.pdf]

|                            |                |                         |
|----------------------------|----------------|-------------------------|
| Patient Visit Rec: _____   | <b>W</b> _____ | <b>V</b> _____          |
| <b>Year</b>                | <b>Week</b>    | <b>Day</b> <b>Visit</b> |
| (Sample: 2007 W12 MON V01) |                |                         |

**QUEENS CANCER CENTER PRIMARY CARE CLINIC – PATIENT VISIT FORM**

**Section A – Patient Visit Background**

**Date of clinic visit:** \_\_\_\_ / \_\_\_\_ / \_\_\_\_      **Medical Record #:** \_\_\_\_\_

**Patient name:** \_\_\_\_\_  
Last First M.I.

**Visit Type:**       1 First visit to QCC PCC       2 Return visit

**Pt. Type:**       1 Preventive care       2 Active Tx       3 Post-treatment

**Visit intensity code:**       1 Low       2 Medium       3 High

**Date of birth:** \_\_\_\_ / \_\_\_\_ / \_\_\_\_      **Zip Code:** \_\_\_\_\_

**Gender:**       1 Male       2 Female

**Current Health Insurance Status:**       1 **Yes** →       Medicaid       Medicare       Private (3<sup>rd</sup> party)  
 0 **No**       3 **Unknown**

**Race:**       1 White       5 American Indian  
 2 Asian       6 More than one  
 3 African American       7 Other \_\_\_\_\_  
 4 Native Hawaiian       99 Unknown

**Ethnicity:**       1 Chinese       4 South Asian  
 2 Hispanic       5 Other \_\_\_\_\_  
 3 Korean       99 Unknown

**Language:**       1 English       2 Spanish       3 Other \_\_\_\_\_  
 99 Unknown

**Work Status:**       1 Employed       2 Retired       3 Unemployed       99 Unknown

**Education:**       No formal education       0-8 years       some high school  
 High school or equiv.       Assoc. Degree       some college  
 BA or BS       Masters       PhD/MD  
 Other \_\_\_\_\_

|                                        |
|----------------------------------------|
| <b>Patient visit background notes:</b> |
|                                        |

|                                 |                |                         |
|---------------------------------|----------------|-------------------------|
| <b>Patient Visit Rec:</b> _____ | <b>W</b> _____ | <b>V</b> _____          |
| <b>Year</b>                     | <b>Week</b>    | <b>Day</b> <b>Visit</b> |
| (Sample: 2007 W12 MON V01)      |                |                         |

## **Section B – Patient’s Family History and Treatment**

### **Patient’s family history:**

|                                      |                                                                                                                                                                                                                      |
|--------------------------------------|----------------------------------------------------------------------------------------------------------------------------------------------------------------------------------------------------------------------|
| <input type="checkbox"/> Grandmother | <input type="checkbox"/> 1 Colorectal <input type="checkbox"/> 2 Head & Neck <input type="checkbox"/> 3 Lung <input type="checkbox"/> 4 Breast <input type="checkbox"/> 5 Cervical <input type="checkbox"/> 7 Other: |
| <input type="checkbox"/> Grandfather | <input type="checkbox"/> 1 Colorectal <input type="checkbox"/> 2 Head & Neck <input type="checkbox"/> 3 Lung <input type="checkbox"/> 6 Prostate <input type="checkbox"/> 7 Other:                                   |
| <input type="checkbox"/> Mother      | <input type="checkbox"/> 1 Colorectal <input type="checkbox"/> 2 Head & Neck <input type="checkbox"/> 3 Lung <input type="checkbox"/> 4 Breast <input type="checkbox"/> 5 Cervical <input type="checkbox"/> 7 Other: |
| <input type="checkbox"/> Father      | <input type="checkbox"/> 1 Colorectal <input type="checkbox"/> 2 Head & Neck <input type="checkbox"/> 3 Lung <input type="checkbox"/> 6 Prostate <input type="checkbox"/> 7 Other:                                   |
| <input type="checkbox"/> Sister      | <input type="checkbox"/> 1 Colorectal <input type="checkbox"/> 2 Head & Neck <input type="checkbox"/> 3 Lung <input type="checkbox"/> 4 Breast <input type="checkbox"/> 5 Cervical <input type="checkbox"/> 7 Other: |
| <input type="checkbox"/> Brother     | <input type="checkbox"/> 1 Colorectal <input type="checkbox"/> 2 Head & Neck <input type="checkbox"/> 3 Lung <input type="checkbox"/> 6 Prostate <input type="checkbox"/> 7 Other:                                   |

**Patient’s cancer type:**    1 Colorectal    2 Head & Neck    3 Lung    4 Breast    5 Cervical    6 Prostate  
 7 Other: \_\_\_\_\_

**Patient’s cancer stage at Dx:**    I    II    III    IV    99 Unknown    88 NA

### **Cancer Treatment:**

|                   |                                                                                                                              |
|-------------------|------------------------------------------------------------------------------------------------------------------------------|
| Chemotherapy      | <input type="checkbox"/> 99 Unknown <input type="checkbox"/> 0 No <input type="checkbox"/> 1 Yes → Tx completion date: _____ |
|                   | Month      Year                                                                                                              |
| Radiation Therapy | <input type="checkbox"/> 99 Unknown <input type="checkbox"/> 0 No <input type="checkbox"/> 1 Yes → Tx completion date: _____ |
|                   | Month      Year                                                                                                              |
| Surgery           | <input type="checkbox"/> 99 Unknown <input type="checkbox"/> 0 No <input type="checkbox"/> 1 Yes → Tx completion date: _____ |
|                   | Month      Year                                                                                                              |

**Cancer treatment notes (Locations of treatments, Physician contact information, etc.):**

## **Section C – Identified Patient Co-morbidities**

- |                                                     |                                                                   |
|-----------------------------------------------------|-------------------------------------------------------------------|
| <input type="checkbox"/> Hypertension               | <input type="checkbox"/> Coronary Artery Disease (Hx of MI, CABG) |
| <input type="checkbox"/> Diabetes Mellitus          | <input type="checkbox"/> Hyperlipidemia                           |
| <input type="checkbox"/> COPD                       | <input type="checkbox"/> Asthma                                   |
| <input type="checkbox"/> Pain                       | <input type="checkbox"/> Depression                               |
| <input type="checkbox"/> Substance abuse/dependence | <input type="checkbox"/> Osteoporosis                             |
| <input type="checkbox"/> Obesity                    | <input type="checkbox"/> Renal failure                            |
| <input type="checkbox"/> Cognitive deficits         | <input type="checkbox"/> Anemia                                   |

|                                                           |
|-----------------------------------------------------------|
| <input type="checkbox"/> Other co-morbidities [describe]: |
|-----------------------------------------------------------|

|                           |                            |             |            |              |       |
|---------------------------|----------------------------|-------------|------------|--------------|-------|
| <b>Patient Visit Rec:</b> | _____                      | <b>W</b>    | _____      | <b>V</b>     | _____ |
|                           | <b>Year</b>                | <b>Week</b> | <b>Day</b> | <b>Visit</b> |       |
|                           | (Sample: 2007 W12 MON V01) |             |            |              |       |

### **Section D – Patient Cancer Screenings**

**Screenings performed at clinic:**      **Screening referrals from clinic:**

- |                                                                                           |                                      |
|-------------------------------------------------------------------------------------------|--------------------------------------|
| <input type="checkbox"/> Clinical Breast Exam                                             | <input type="checkbox"/> Colonoscopy |
| <input type="checkbox"/> Digital Rectal Exam                                              | <input type="checkbox"/> PAP Test    |
| <input type="checkbox"/> PSA                                                              | <input type="checkbox"/> Mammogram   |
| <input type="checkbox"/> FOBT                                                             |                                      |
| <input type="checkbox"/> Medical clearance for cancer surgery and/or diagnostic treatment |                                      |

|                                                         |
|---------------------------------------------------------|
| <input type="checkbox"/> Other screening(s) [describe]: |
|---------------------------------------------------------|

### **Section E – Patient Survivorship Service Referrals**

**Medical:**

- Admission to Hospital (Direct)
- Cardiology Clinic
- Dental Clinic
- Gastroenterology Clinic
- Gynecology Clinic
- Immunology Clinic (HIV)
- Rehabilitation
- Medical Oncology
- Ophthalmology
- Psychiatry
- Pulmonary Clinic
- Surgery/ Surgical Oncology
- Radiation Oncology

**Support and behavior change:**

- Financial Counselor
- Legal Services
- Pain Management
- Patient Navigator Program
- Social Work
- Nutrition
- Smoking Cessation

|                                                        |
|--------------------------------------------------------|
| <input type="checkbox"/> Other referral(s) [describe]: |
|--------------------------------------------------------|

### **Section F – Medical Problems Identified Post-Treatment**

- |                                                     |                                                     |
|-----------------------------------------------------|-----------------------------------------------------|
| <input type="checkbox"/> Anemia                     | <input type="checkbox"/> Nerve Damage               |
| <input type="checkbox"/> Bladder Dysfunction        | <input type="checkbox"/> Oral Caries/Osteonecrosis  |
| <input type="checkbox"/> Bowel Dysfunction          | <input type="checkbox"/> Osteoporosis               |
| <input type="checkbox"/> Cancer Recurrence          | <input type="checkbox"/> Ostomy                     |
| <input type="checkbox"/> Cardiovascular Disease     | <input type="checkbox"/> Pain                       |
| <input type="checkbox"/> Cognitive Deficits         | <input type="checkbox"/> Premature Menopause        |
| <input type="checkbox"/> Depression                 | <input type="checkbox"/> Psychosocial distress      |
| <input type="checkbox"/> Diabetes Mellitus          | <input type="checkbox"/> Pulmonary Function Deficit |
| <input type="checkbox"/> Fatigue/Muscle Wasting     | <input type="checkbox"/> Renal failure              |
| <input type="checkbox"/> Hyperlipidemia             | <input type="checkbox"/> Sexual dysfunction         |
| <input type="checkbox"/> Increase risk of infection | <input type="checkbox"/> Substance Abuse/Dependence |
| <input type="checkbox"/> Infertility                | <input type="checkbox"/> Weight Gain                |
| <input type="checkbox"/> Lymphedema                 |                                                     |
| <input type="checkbox"/> Malnutrition               |                                                     |

|                                                           |
|-----------------------------------------------------------|
| <input type="checkbox"/> Other late effect(s) [describe]: |
|-----------------------------------------------------------|
